# Supplementary material for: A corresponding V-target lattice structure to enhance selection pressure for aptamer selection
Source: Royal Society of Chemistry journal article supplement (doi:10.1039/d2sd00219a), 2023-01-01
Supplement: d2sd00219a1.pdf [file d2sd00219a1.pdf]

## **Supporting Information for**

### **Corresponding V-Target Lattice Structure to Enhance Selection Pressure for Aptamers Selection**

Yong-Tao Wang, Meng Wang, Ke-Zhu Yang, Zhi-Ling Zhang\*

College of Chemistry and Molecular Sciences, Wuhan University, Wuhan  
430072, China

Zhi-Ling Zhang, Email: [zlzhang@whu.edu.cn](mailto:zlzhang@whu.edu.cn). Fax: 0086-27-68754067.

## **Table of Contents**

Supplemental Figure S1. Detailed Parameters of Three Structures

Supplemental Figure S2. Velocity and Vorticity Distributions of Different Cross-sections with Different Structures

Supplemental Figure S3. Characterization of the Microfluidic Chip with the Corresponding V-Lattice Structure

Supplemental Figure S4. Characterization of HA Protein Coated MNs

Supplemental Figure S5. Preparation of the Evolved ssDNA Libraries

Supplemental Figure S6. Characterization of the Obtained Sequences

Supplemental Figure S7. Characterization of Aptamers

Supplemental Movie S1. Oblique View of the Particle Moving Trajectory without Superstructure

Supplemental Movie S2. Side View of the Particle Moving Trajectory without Superstructure

Supplemental Movie S3. Oblique View of the Particle Moving Trajectory with the Corresponding V-Lattice Structure

Supplemental Movie S4. Side View of the Particle Moving Trajectory with the Corresponding V-Lattice Structure

## S.1 Detailed Parameters of the Three Structures

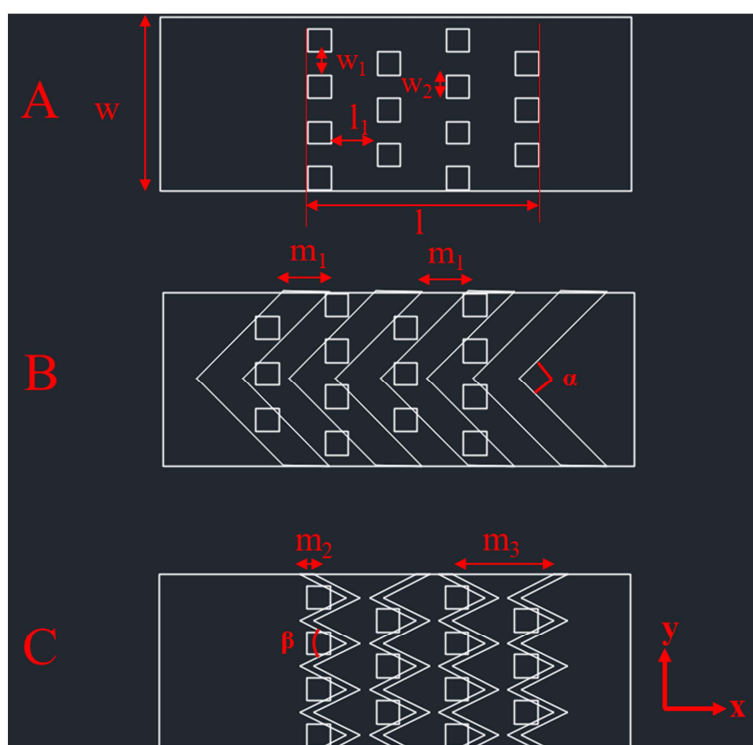

**Fig. S1** Top views of the three channel models with no structure (A), with forward herringbone structure (B) and with corresponding V-shaped structure (C).

In Fig. S1, the width ( $w$ ) of the chip with three channel structures is  $800\ \mu\text{m}$  and the height was  $50\ \mu\text{m}$ . The target array area of the three structures is consistent, containing  $30 \times 8$  lattices, each of which is  $50\ \mu\text{m}$  long and wide and  $20\ \mu\text{m}$  high. The distance ( $w_1$ ) between two adjacent lattices on the Y- dimension is  $50\ \mu\text{m}$ , and the distance ( $l_1$ ) between two adjacent lattices on the X- dimension is  $100\ \mu\text{m}$ , and the length ( $l$ ) of the whole array area is  $4.4\ \text{mm}$  (Fig. S1A). The height of the forward herringbone structure is  $20\ \mu\text{m}$ , the width ( $m_1$ ) of the arms and the distance ( $m_1$ ) between the

arms are 100  $\mu\text{m}$ , and the angle ( $\alpha$ ) between the two arms is  $90^\circ$  (Fig. S1B). The height of the corresponding V-shaped structure is 20  $\mu\text{m}$ , the width ( $m_2$ ) of the arms is 30  $\mu\text{m}$ , the distance ( $m_3$ ) between the arms is 120  $\mu\text{m}$ , and the angle ( $\beta$ ) between the two arms is  $53^\circ$  (Fig. S1C).

## S.2. Velocity and Vorticity Distributions of Different Cross-sections with Different Structures

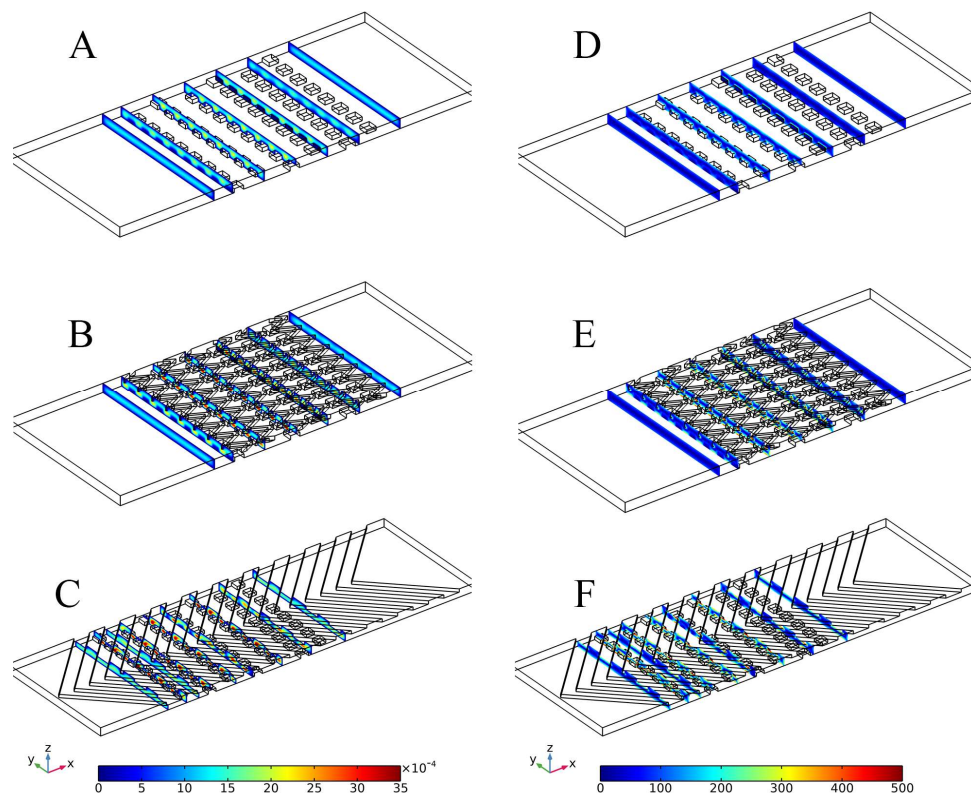

**Fig. S2** Velocity field distribution of different cross-sections in the channel with no superstructure (A), with the corresponding V-shaped structure (B) and with the forward herringbone structure (C). The scale unit of velocity field is  $\text{m}\cdot\text{s}^{-1}$ . Vorticity field distribution of different cross-sections in the channel with no superstructure (D), with the corresponding V-shaped structure (E) and with the forward herringbone structure (F). The scale unit of vorticity field is  $\text{s}^{-1}$ .

### S.3 Characterization of the Microfluidic Chip with the Corresponding V-Lattice Structure

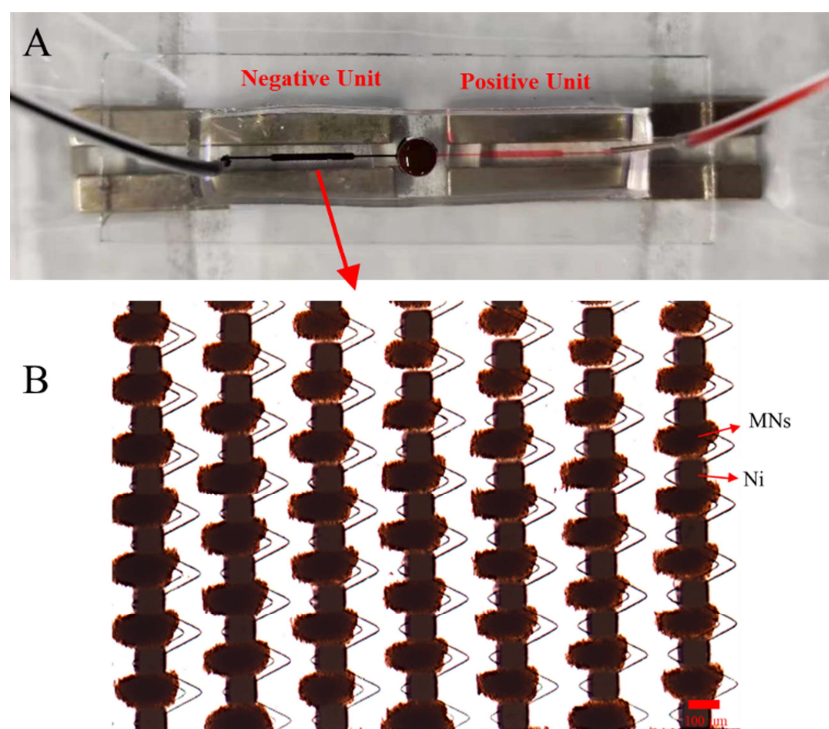

**Fig. S3** (A) Photograph of the microfluidic chip with the corresponding V-lattice structure. (B) Microscopic image of MNs-HA captured by the microfluidic chip with the corresponding V-lattice structure.

## S.4 Characterization of HA Protein Coated MNs

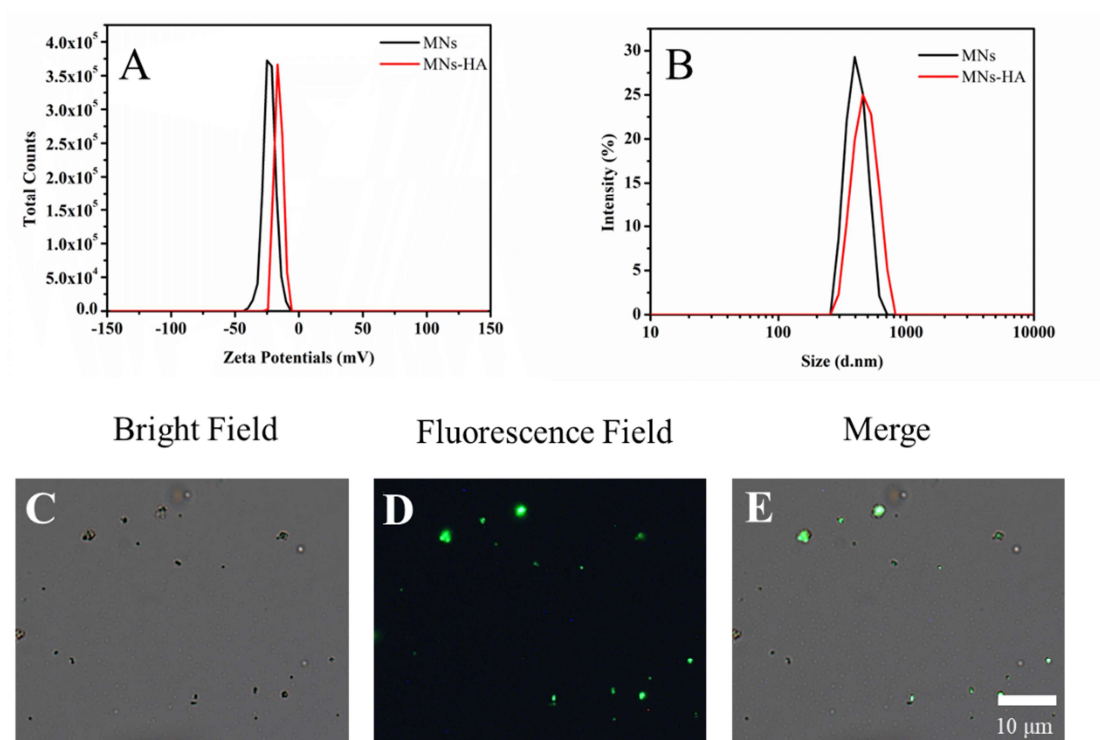

**Fig. S4** (A) Zeta ( $\zeta$ ) potential of MNs and MNs-HA-H5N1. (B) Hydrodynamic size of MNs and MNs-HA-H5N1. (C-D) Microscopic image of MNs-HA-H5N1 incubating with influenza A H5N1 HA antibody (mouse Mab) and Goat Anti-Mouse IgG-Alexa Fluor 488.

## S.5 Preparation of the Evolved ssDNA Libraries

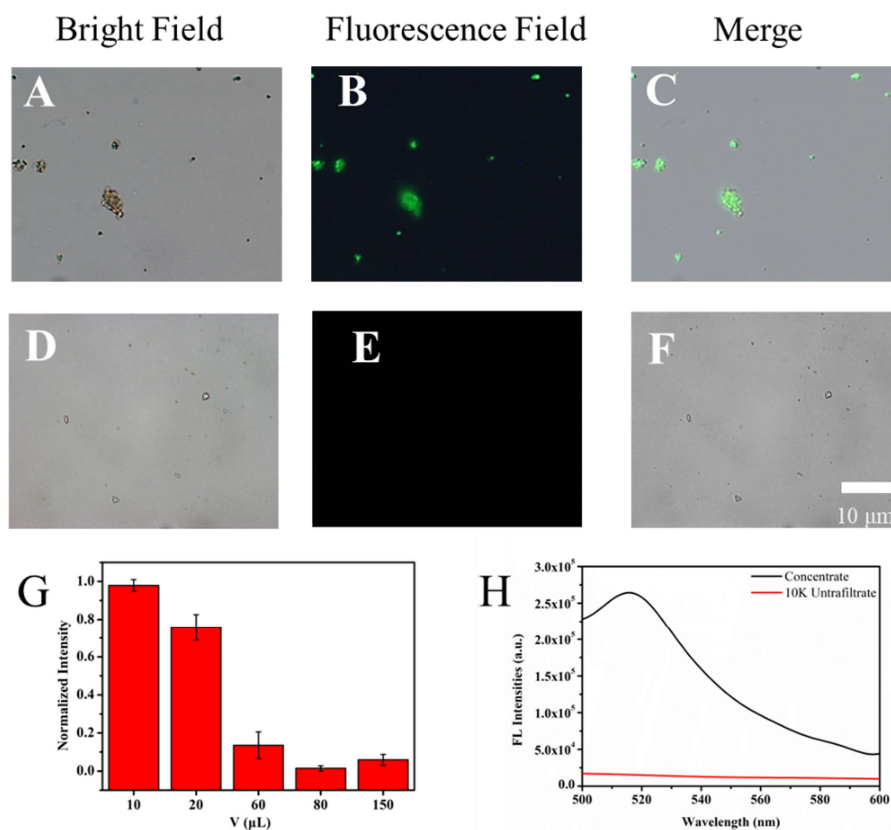

**Fig. S5** (A-C) Microscopic image of amplification products captured by MNs-SA. (D-F) Microscopic image of MNs-SA-biotin-DNA treated with NaOH. (G) Optimization of MNs-SA amount during capturing the biotin modified PCR products. Error bars correspond to standard deviation ( $n=3$ ) (H) Purification of the evolved libraries by a 10K ultrafiltration tube.



## S.6 Characterization of the Obtained Sequences

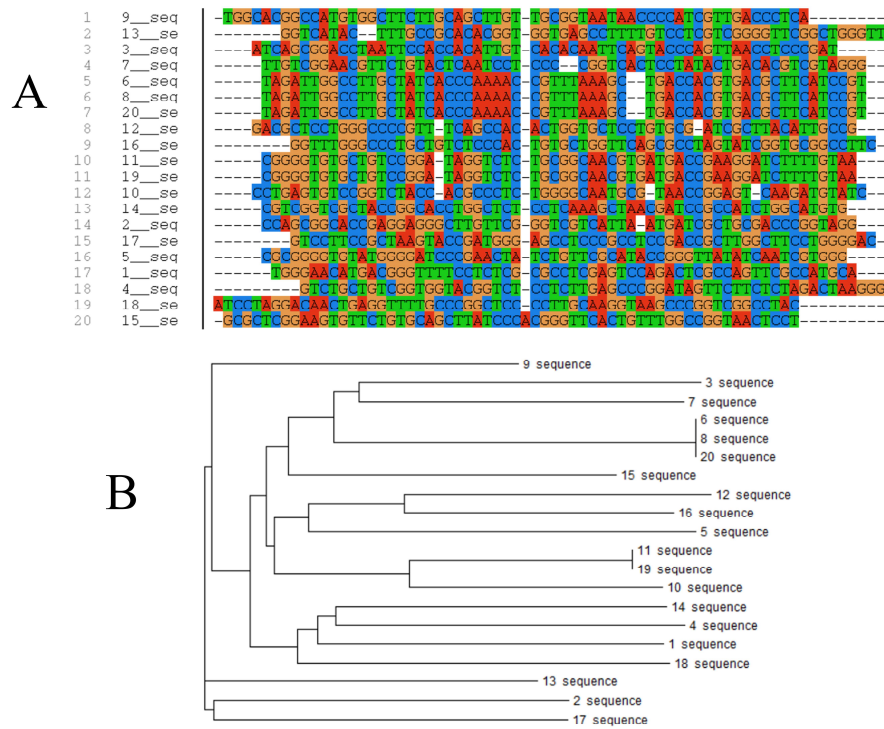

**Fig. S6** (A) Sequences analysis after three rounds of selection. (B) Phylogenetic tree of the obtained sequences.

## S.7 Characterization of Aptamers

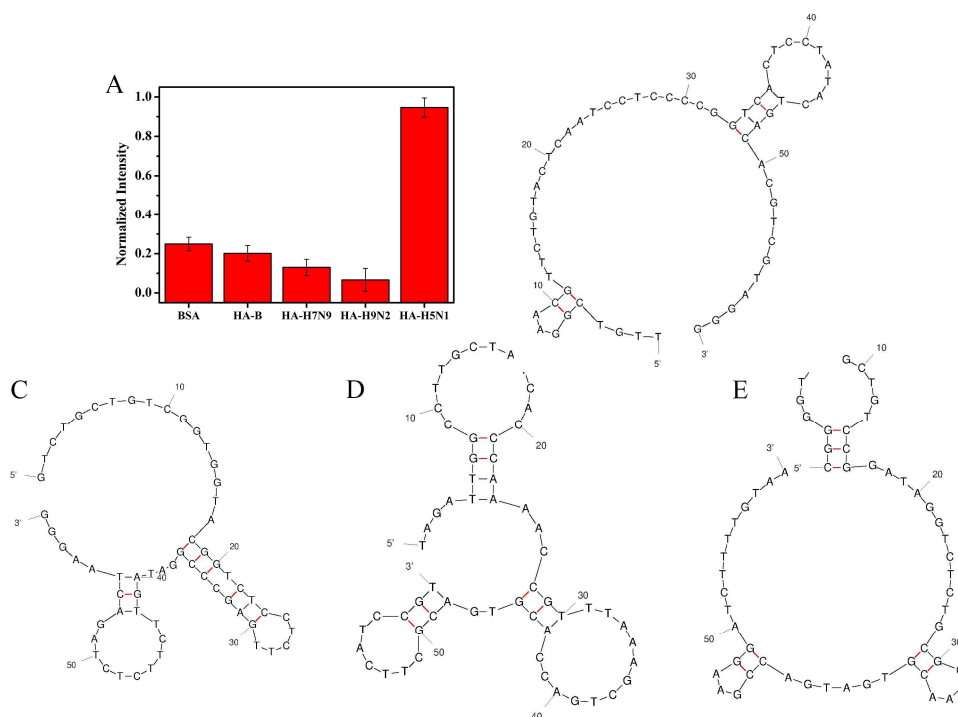

**Fig. S7** (A) Specificity of 7-aptamer for HA-H5N1. Error bars correspond to standard deviation (n=3). (B-E) Secondary structure analysis of 7-aptamer, 4-aptamer, 6-aptamer, 11-aptamer.

**Movie S1. Oblique View of the Particle Moving Trajectory without Superstructure**

**Movie S2. Side View of the Particle Moving Trajectory without Superstructure**

**Movie S3. Oblique View of the Particle Moving Trajectory with the Corresponding V-Lattice Structure**

**Movie S4. Side View of the Particle Moving Trajectory with the Corresponding V-Lattice Structure**

By releasing 100 particles in the channel, velocity field and particle trajectories were coupled. Then the particle trajectories in the channel at different times were obtained by solving Navier-Stokes equations in transient state. An arrow represented a particle, the length of the arrow represented the particle of the velocity, and the direction of the arrow represented the direction in which the particle was moving.
